# Supplementary material for: PRDM15 is a key regulator of metabolism critical to sustain B-cell lymphomagenesis
Source: PubMed Central journal article supplement (PMC7360777; doi:10.1038/s41467-020-17064-0), 2020-07-14
Supplement: 41467_2020_17064_MOESM2_ESM.pdf [file 41467_2020_17064_MOESM2_ESM.pdf]

**Editorial Note:** This manuscript has only been reviewed at another journal that is not operating a transparent peer review scheme.
