# Supplementary material for: PRDM15 is a key regulator of metabolism critical to sustain B-cell lymphomagenesis
Source: PubMed Central journal article supplement (PMC7360777; doi:10.1038/s41467-020-17064-0), 2020-07-14

Fig. 5a

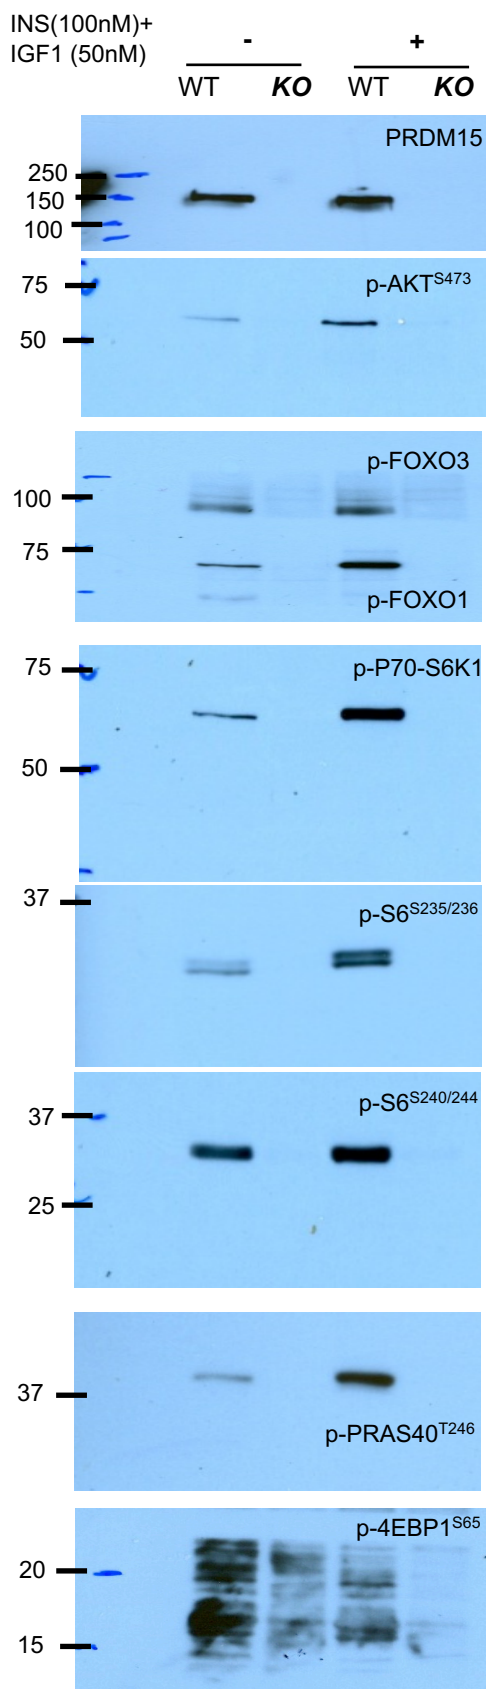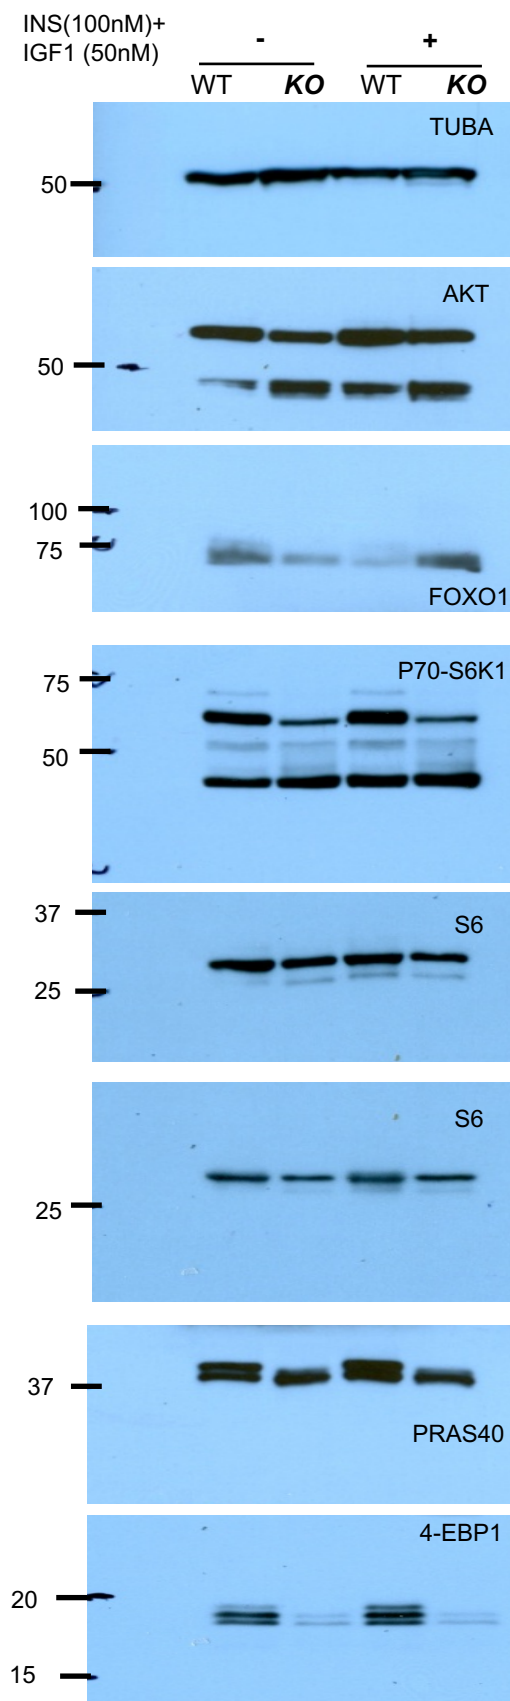

Fig. 5b

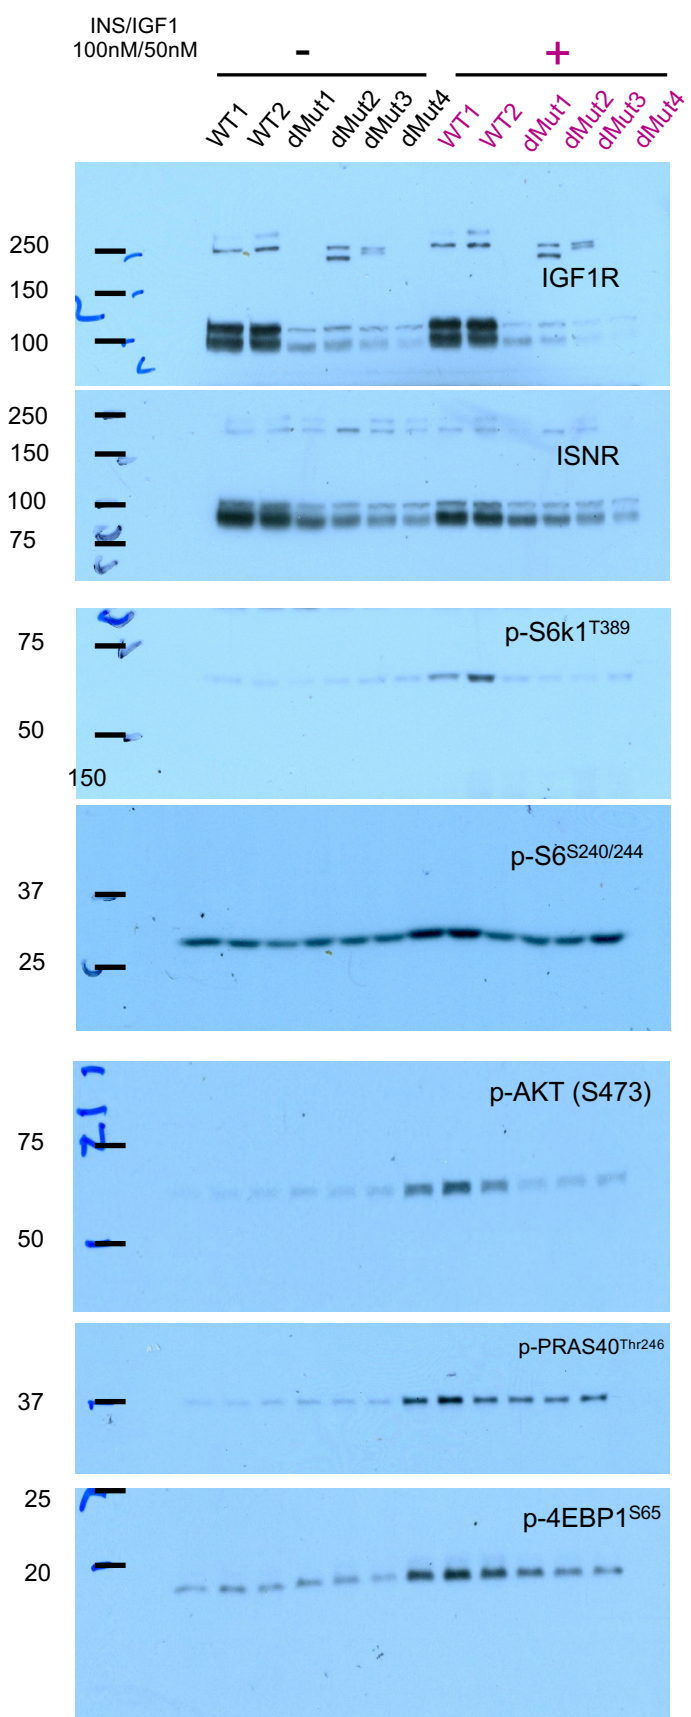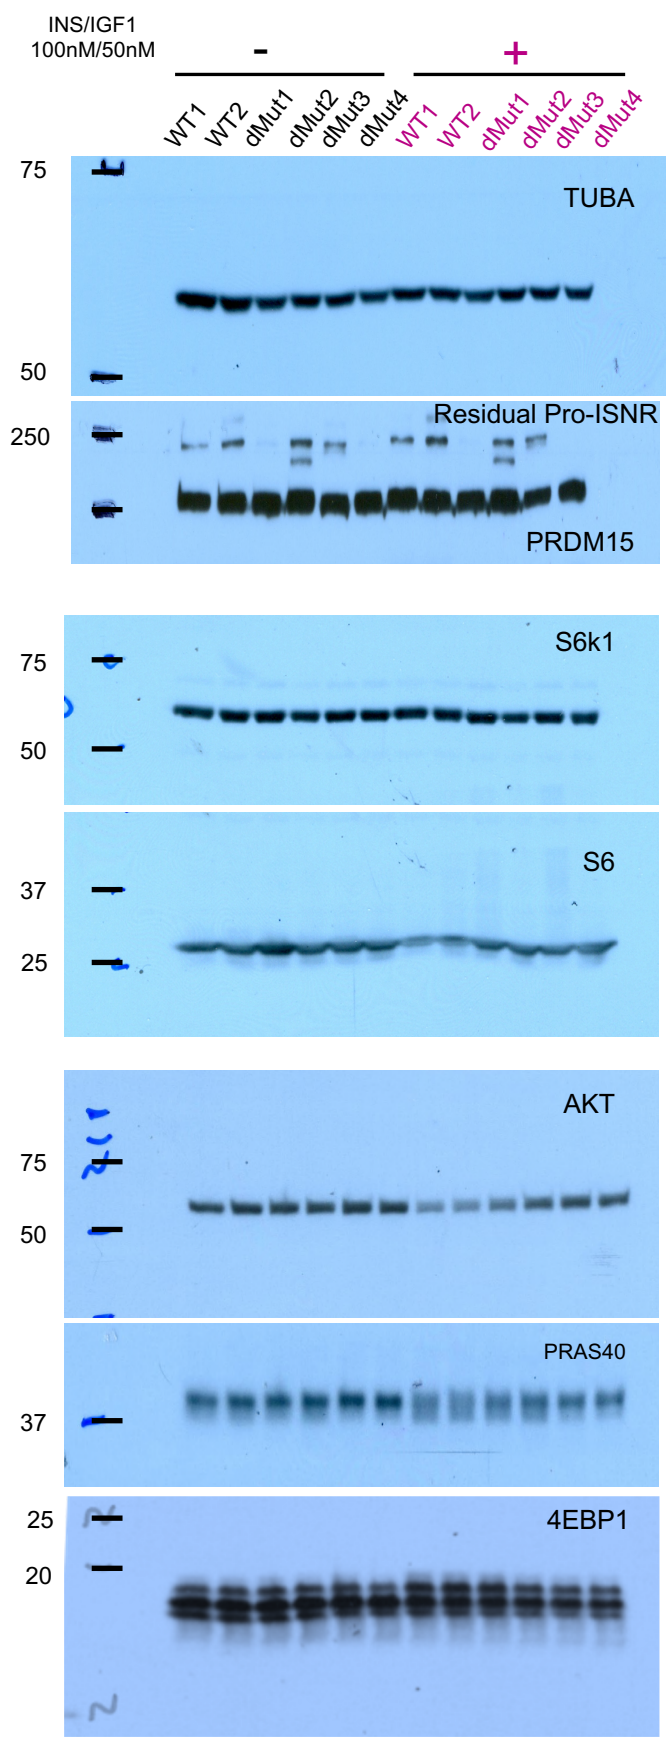

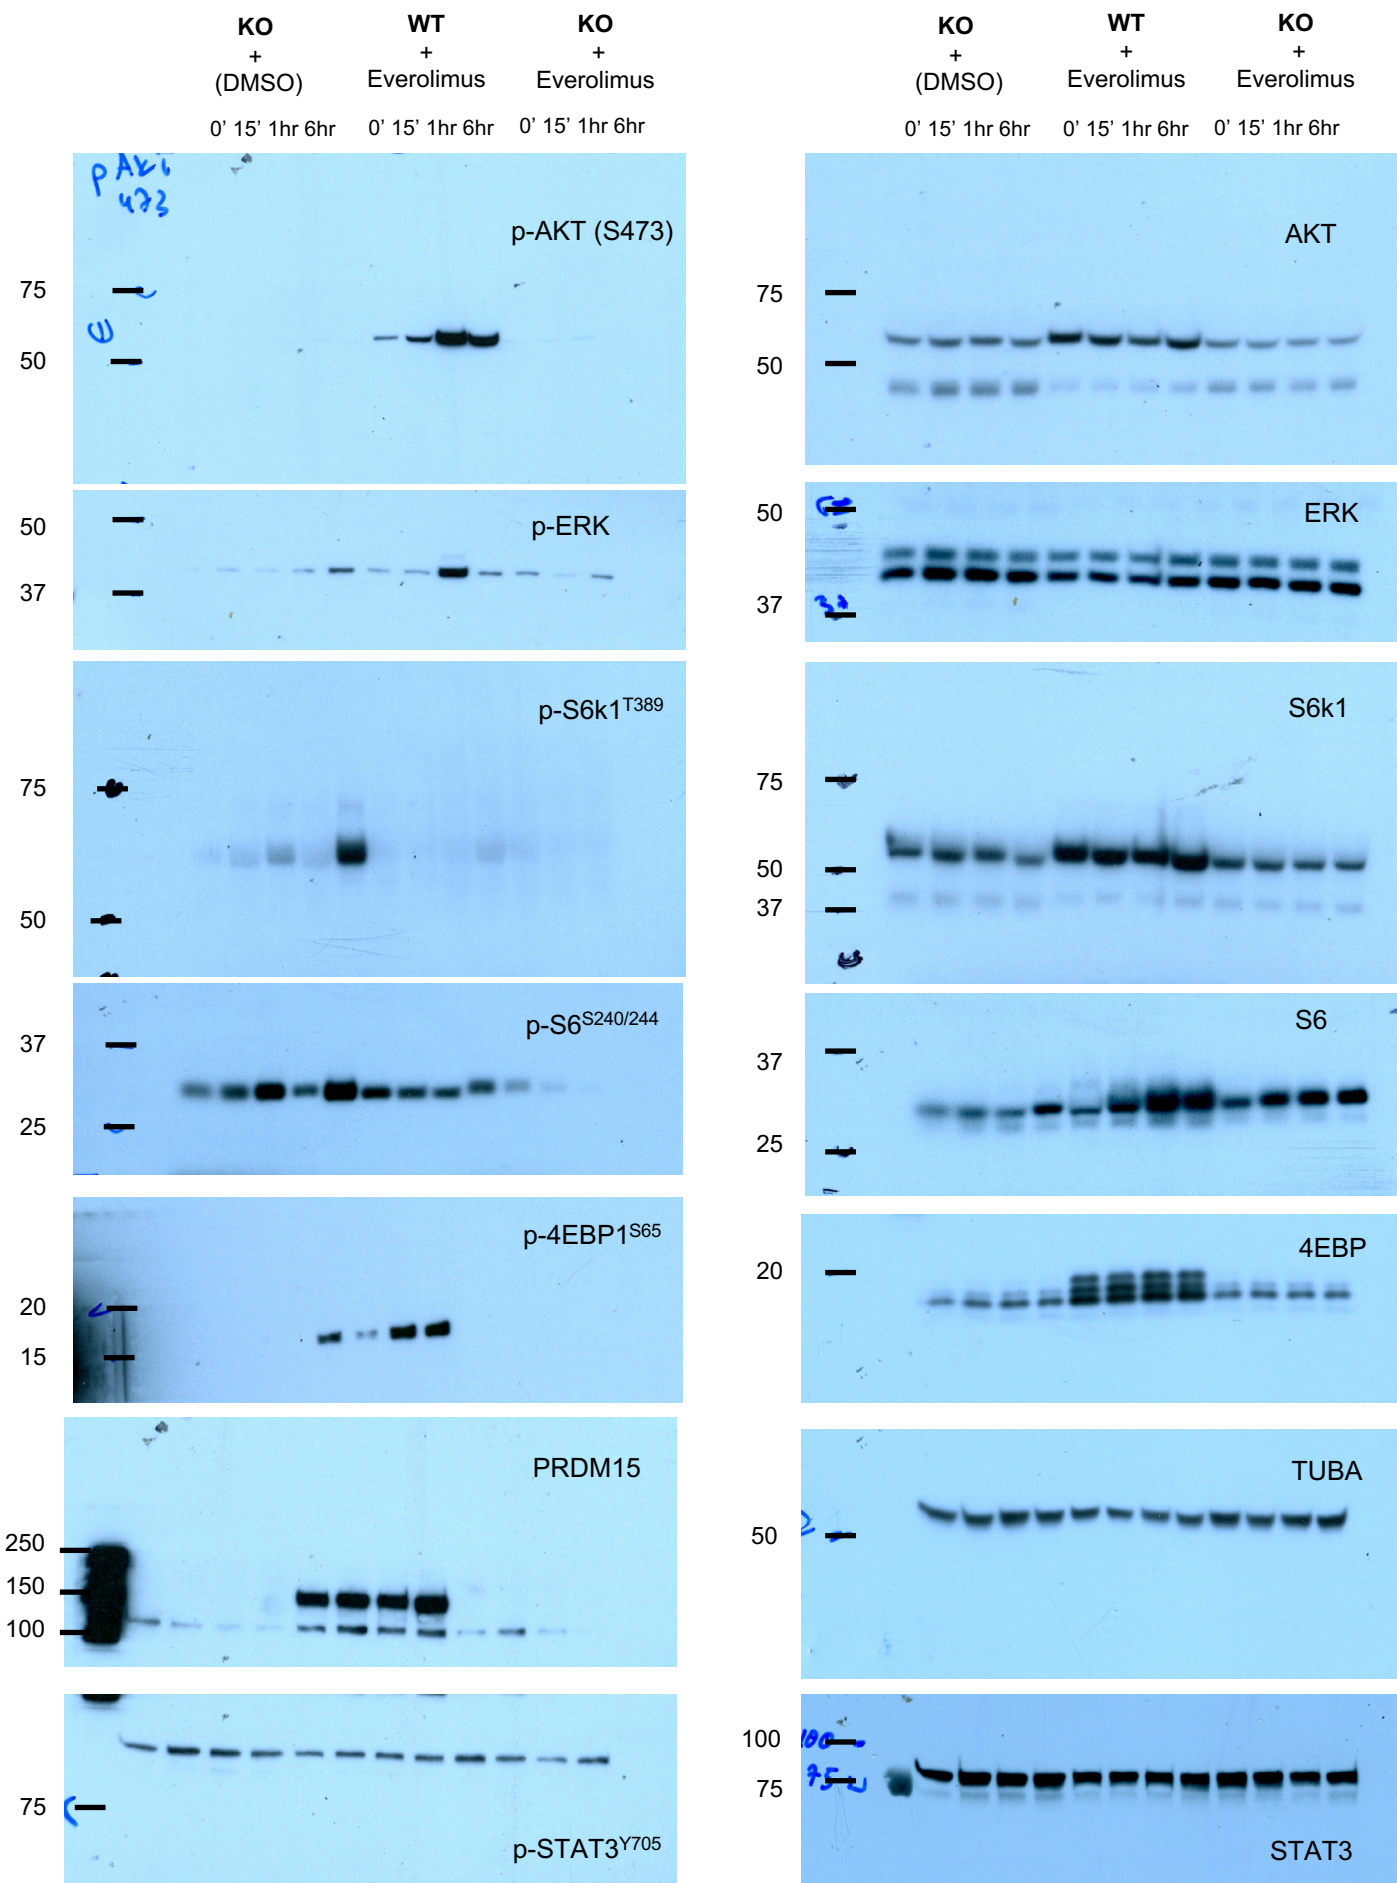

Supp. Fig. 7d

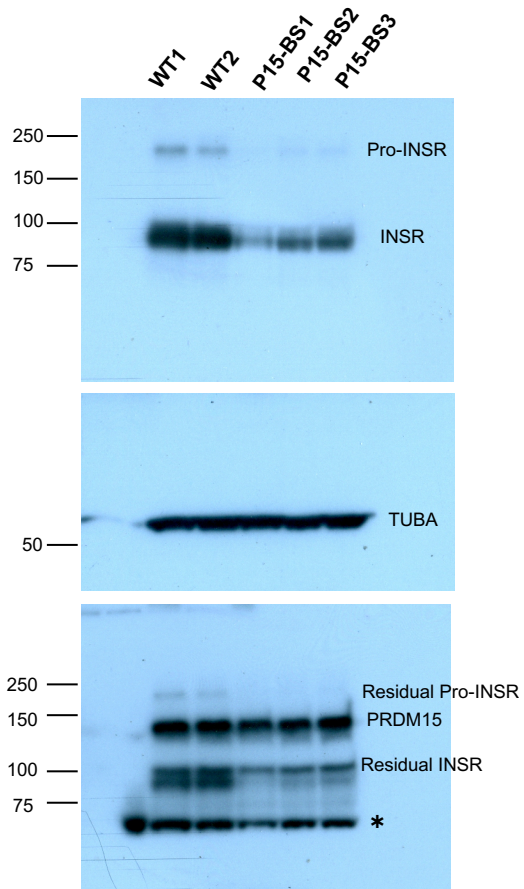

Fig. 3a

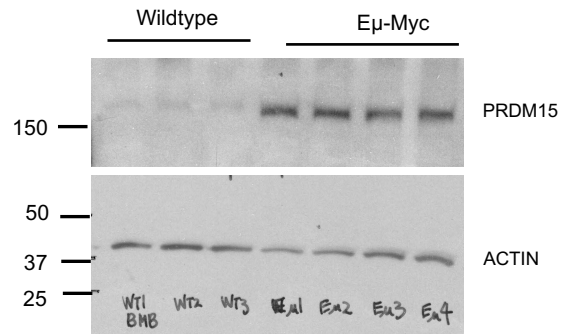

Supp. Fig 3b

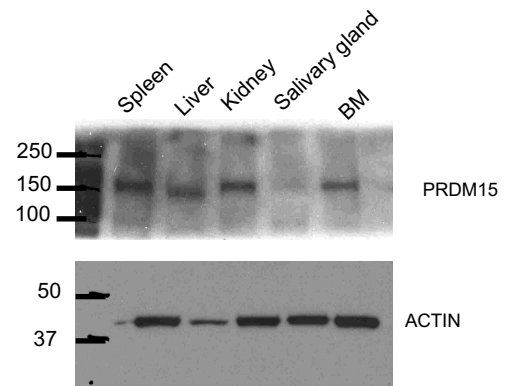

Fig. 1e

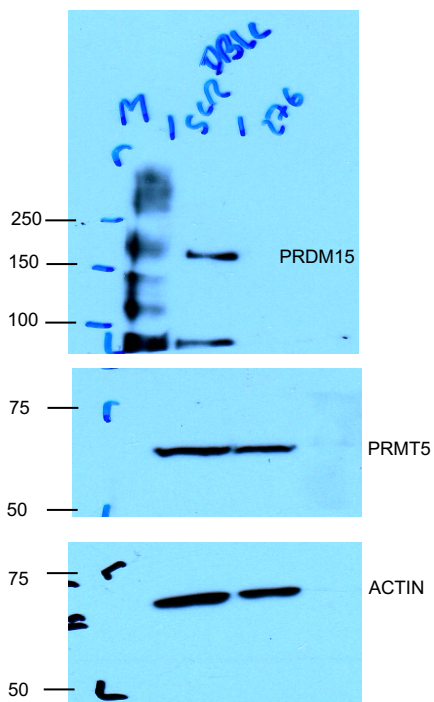

Fig. 3c

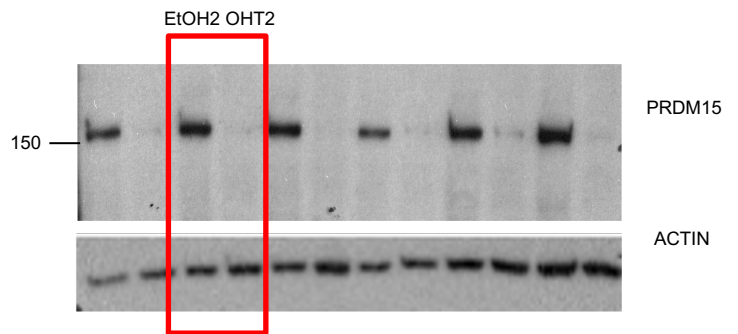

\* unspecific band

**Supp. Fig. 2a**

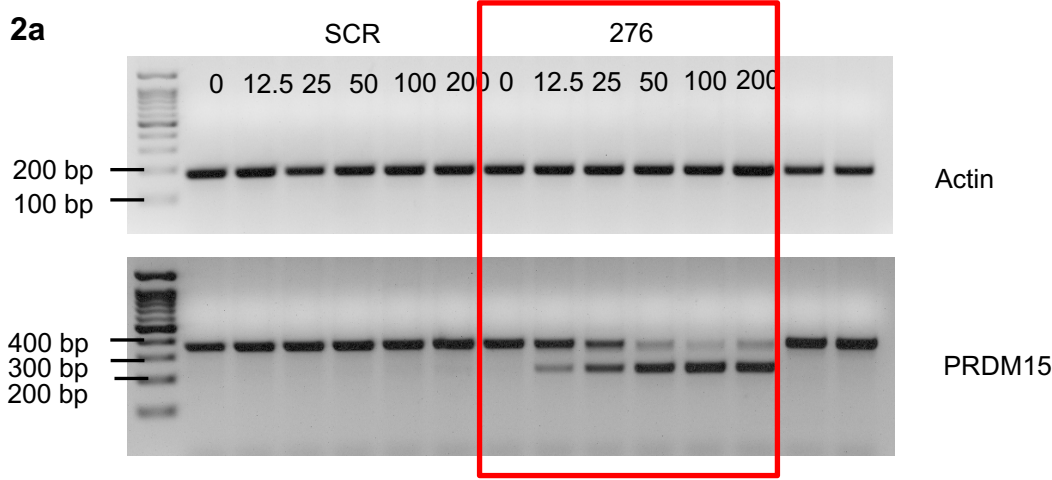

**Supp. Fig. 2c**

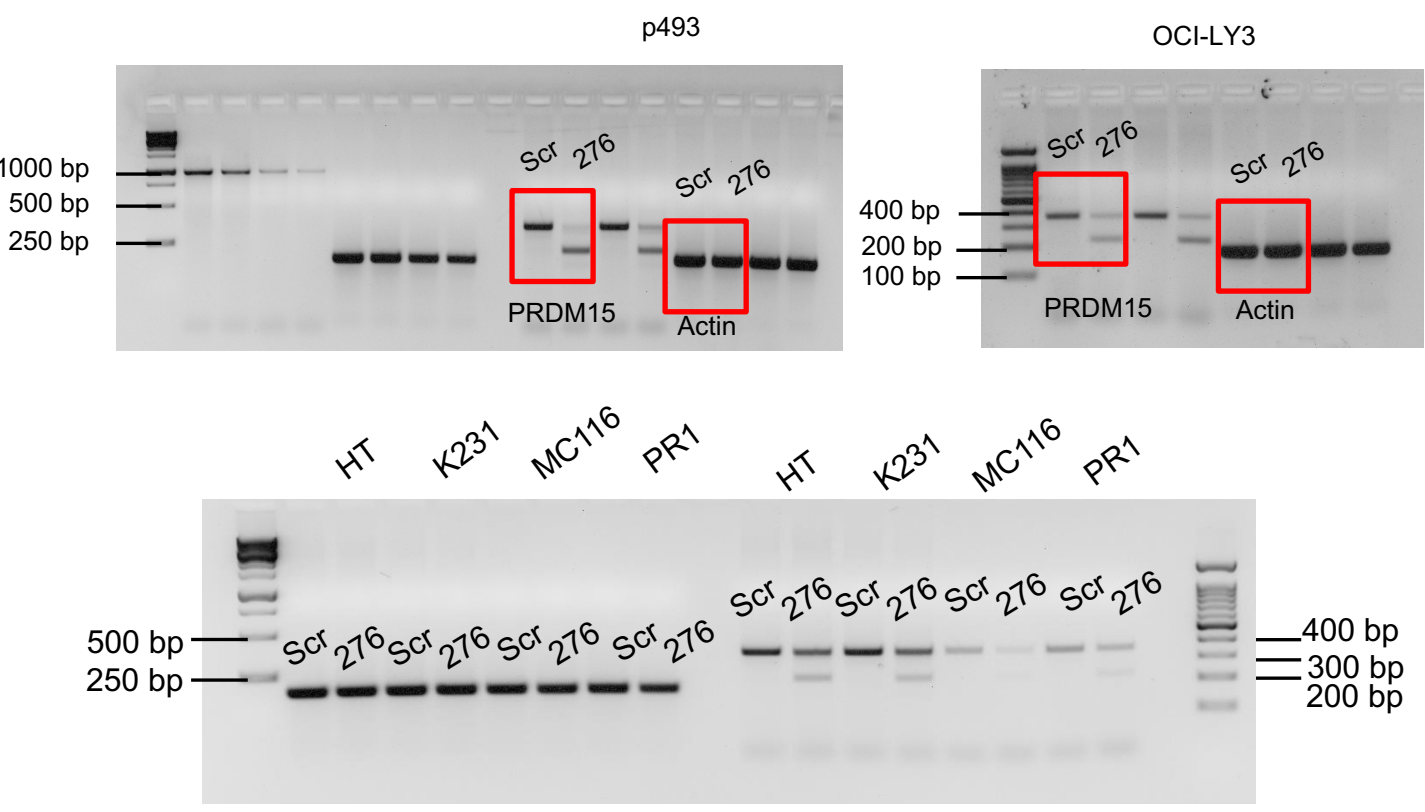

**Supp. Fig. 3c**

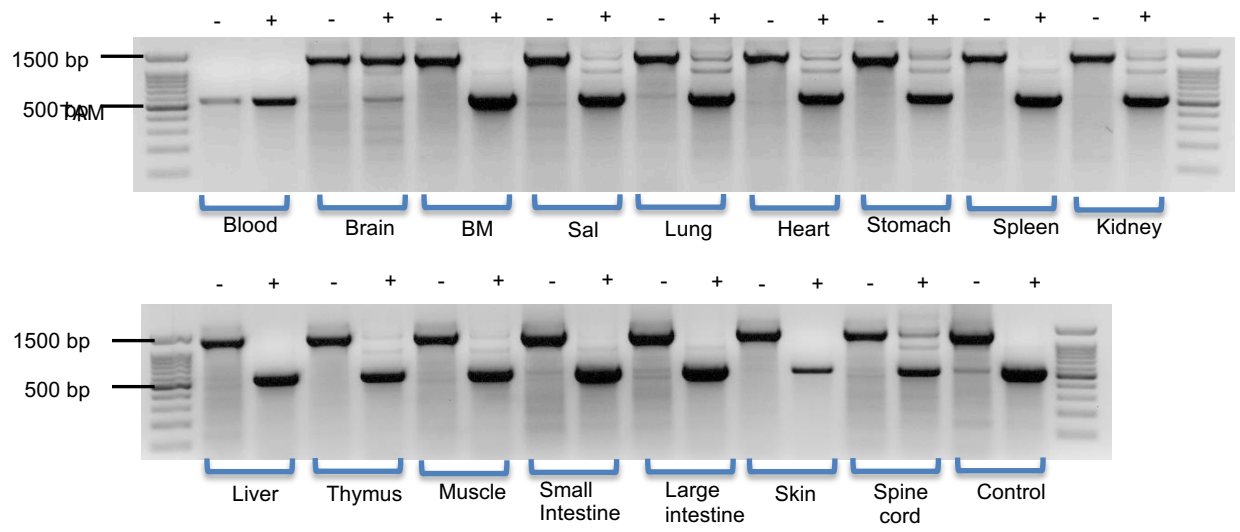

Supplement: 41467_2020_17064_MOESM16_ESM.pdf [file 41467_2020_17064_MOESM16_ESM.pdf]
